# Supplementary material for: NMR-guided refinement of crystal structures using 15N chemical shift tensors
Source: Royal Society of Chemistry journal article supplement (doi:10.1039/d4ce00237g), 2024-01-01
Supplement: d4ce00237g1.pdf [file d4ce00237g1.pdf]

## Supporting Information

### Table of contents.

|                                                                                                     |   |
|-----------------------------------------------------------------------------------------------------|---|
| 1. The GRANT refined coordinates for the six benchmark structures and two tripeptides (AGG and GGV) | 1 |
| 2. Experimental and computed <sup>15</sup> N shift tensors for all structures                       | 7 |
| 3. Data collection, refinement and other relevant crystallographic data for AGG                     | 8 |
| 4. Ellipsoidal plot of the final structure of AGG.                                                  | 9 |

### NMR refined coordinates

#### Cimetidine (CIMETD03)

a = 10.7092, b = 18.8262 c = 6.8266  $\alpha$  = 90.0,  $\beta$  = 111.306,  $\gamma$  = 90.0

H1 H 0.37691 0.31269 -0.29632  
H2 H 0.17699 0.27738 -0.20399  
H3 H 0.12004 0.03622 0.38419  
H4 H 0.14167 0.13476 -0.03176  
H5 H 0.64168 0.26444 -0.14288  
H6 H 0.57263 0.21321 -0.36333  
H7 H 0.64811 0.17287 -0.136128  
H8 H 0.39652 0.05110 -0.049987  
H9 H 0.31799 0.15084 0.28294  
H10 H 0.38586 0.10259 0.50901  
H11 H 0.29745 -0.00286 0.30659  
H12 H 0.24338 0.03913 0.08010  
H13 H -0.09735 0.20273 -0.15490  
H14 H -0.02294 0.17035 -0.32512  
H15 H -0.13921 0.12031 -0.27283  
H16 H 0.55568 0.08384 -0.01098  
C1 C 0.26433 0.24625 -0.17620  
C2 C 0.40725 0.16255 -0.07937  
C3 C 0.46133 0.21270 -0.16582  
C4 C 0.58825 0.21609 -0.20520  
C5 C 0.46516 0.09381 0.01513  
C6 C 0.35972 0.10138 0.34082  
C7 C 0.25873 0.04428 0.23568  
C8 C 0.02885 0.08971 0.11692  
C9 C -0.06029 0.15706 -0.20794  
C10 C -0.12642 0.04939 0.24915  
N1 N 0.36740 0.26573 -0.22674  
N2 N 0.28017 0.18441 -0.08948  
N3 N 0.12908 0.05500 0.25444  
N4 N 0.04556 0.12494 -0.04026

N5 N -0.09202 0.09238 0.13118  
N6 N -0.16953 0.01282 0.34654  
S1 S 0.51688 0.08869 0.30080

### **Histidine HCl H<sub>2</sub>O (HISTCM01)**

a = 15.301, b = 8.921 c = 6.846  $\alpha = 90.0$ ,  $\beta = 90.0$ ,  $\gamma = 90.0$

H 0.28201 -0.89751 0.17445  
H 0.36671 -0.50229 0.38175  
H 0.35823 -1.01163 0.09545  
H 0.30765 -1.03739 0.30818  
H 0.39592 -0.66030 -0.18814  
H 0.29723 -0.33307 0.13667  
H 0.44547 -0.95462 0.36285  
H 0.46592 -0.83225 0.05589  
H 0.50708 -0.74252 0.25271  
H 0.32448 -0.41232 -0.20287  
H 0.10833 0.12103 0.29936  
H 0.02726 0.14533 0.41451  
C 0.36591 -0.80261 0.50210  
C 0.40161 -0.87745 0.32025  
C 0.44907 -0.77077 0.18363  
C 0.40083 -0.63410 0.12580  
C 0.34307 -0.47201 -0.07098  
C 0.36766 -0.52196 0.23246  
N 0.33225 -0.96113 0.21667  
N 0.38479 -0.59889 -0.06372  
N 0.33165 -0.42243 0.10683  
O 0.28763 -0.81174 0.53938  
O 0.42313 -0.73332 0.59934  
O 0.08008 0.08847 0.40635  
Cl 0.17438 0.22224 0.03165

### **Glycylglycine HCl H<sub>2</sub>O (GLCICH01)**

a = 8.813, b = 9.755 c = 9.788  $\alpha = 90.0$ ,  $\beta = 104.10$ ,  $\gamma = 90.0$

H -0.44840 0.50385 0.34149  
H -0.43247 0.63270 0.23787  
H -0.28221 0.57640 0.35119  
H -0.45994 0.41199 0.12319  
H -0.30614 0.51042 0.10402  
H -0.32030 0.22280 0.08702  
H -0.12277 0.07022 0.12529  
H -0.01687 0.16178 0.26009  
H -0.10441 -0.14227 0.40543  
H -0.04891 -0.31933 0.54501

H -0.22227 -0.28565 0.53316  
C -0.35226 0.455321 0.17917  
C -0.23456 0.34733 0.24847  
C -0.13278 0.12490 0.21342  
C -0.17496 0.02612 0.31727  
N -0.38069 0.54926 0.28509  
N -0.23898 0.23533 0.17403  
O -0.14456 0.37112 0.36140  
O -0.28605 0.04070 0.36890  
O -0.07592 -0.07572 0.34388  
O -0.14311 -0.28819 0.48543  
Cl 0.44642 0.31098 0.41465

**Thymine (THYMIN01)**

a = 12.889, b = 6.852 c = 6.784  $\alpha = 90.0$ ,  $\beta = 104.92$ ,  $\gamma = 90.0$

H 0.59900 0.28750 0.34797  
H 0.59801 -0.29859 0.36181  
H 0.77915 0.29178 0.53512  
H 0.94215 0.14104 0.71051  
H 0.92142 -0.06278 0.83304  
H 0.95852 -0.08588 0.61794  
C 0.58121 -0.00649 0.34094  
C 0.74413 -0.18671 0.51579  
C 0.79767 0.00089 0.56865  
C 0.74363 0.15912 0.50392  
C 0.91298 -0.00335 0.6899  
N 0.63928 0.15965 0.39583  
N 0.63952 -0.17179 0.40631  
O 0.49068 -0.00994 0.24575  
O 0.78669 -0.34579 0.56432

**Acetaminophen (HXACAN26)**

a = 12.88559, b = 9.38013 c = 7.10096  $\alpha = 90.0$ ,  $\beta = 115.7002$ ,  $\gamma = 90.0$

H 0.73434 0.04457 0.19004  
H 0.48956 0.41110 -0.37030  
H 0.65832 0.25609 -0.24597  
H 0.57425 0.11652 0.22441  
H 0.41082 0.27228 0.10324  
H 0.19420 0.69453 -0.41842  
H 0.10546 0.55723 -0.53697  
H 0.16487 0.57552 -0.27060  
H 0.30188 0.44410 -0.10573  
C 0.43562 0.35021 -0.14603  
C 0.50825 0.34560 -0.24423  
C 0.60283 0.25566 -0.17348

C 0.62798 0.17241 -0.00096  
C 0.55738 0.17744 0.10250  
C 0.46246 0.26823 0.02806  
C 0.28067 0.50143 -0.39125  
C 0.17762 0.58939 -0.40418  
N 0.33901 0.43798 -0.21500  
O 0.71982 0.08514 0.06433  
O 0.30360 0.50079 -0.54307

### **Glycine (GLYCIN18)**

a = 7.037, b = 7.037 c = 5.478 a = 90.0, b = 90.0, g = 120.0

H -0.62430 -0.76730 -0.07797  
H -0.42444 -0.81900 -0.08733  
H -0.88373 -1.14479 -0.09046  
H -0.67585 -1.19478 -0.11740  
H -0.58699 -0.89645 0.14516  
C -0.72578 -1.08266 -0.15918  
C -0.72331 -1.05528 -0.43299  
N -0.57897 -0.87691 -0.03507  
O -0.87373 -1.21201 -0.54853  
O -0.56985 -0.88325 -0.52526

### **L-Alanyl-glycyl-glycine monohydrate (AGG) (New REFCODE)**

a = 12.199, b = 5.37, c = 7.900,  $\alpha$  = 90.0,  $\beta$  = 102.14,  $\gamma$  = 90.0

H 0.64962 0.12653 0.05189  
H 0.56080 0.21747 0.16079  
H 0.59903 0.40014 0.02333  
H 0.80888 0.24969 0.48929  
H 0.76905 0.01067 0.35051  
H 0.67335 0.15468 0.44712  
H 0.69218 0.53399 0.29028  
H 0.89527 0.60134 0.37533  
H 1.04139 0.74870 0.26142  
H 0.99274 0.58437 0.07713  
H 1.18968 0.49193 0.12606  
H 1.23943 0.02227 0.27597  
H 1.30985 0.24455 0.40524  
H 1.47920 0.76478 0.34058  
H 1.51614 0.62701 0.50631  
C 0.71831 0.36395 0.24674  
C 0.74380 0.18112 0.39337  
C 0.82027 0.40420 0.16680  
C 1.00518 0.57649 0.21142

C 1.08844 0.37025 0.27894  
C 1.27072 0.20387 0.27700  
C 1.35888 0.20190 0.16917  
N 0.62554 0.27295 0.11124  
N 0.89930 0.54460 0.25894  
N 1.18080 0.37351 0.21507  
O 0.82683 0.30350 0.03151  
O 1.07116 0.21950 0.38623  
O 1.44396 0.06786 0.22733  
O 1.34378 0.31758 0.03016  
O 1.50384 0.60949 0.38654

**Glycyl-glycyl-L-valine dihydrate (GGV), CUWRUH**

a = 5.786, b = 7.954, c = 14.420, a = 90.0, b = 93.85, g = 90.0

H -0.09923 0.12027 0.47593  
H -0.05915 -0.04531 0.54113  
H -0.29606 0.05468 0.54302  
H -0.39113 -0.01706 0.38576  
H -0.34980 -0.18949 0.45425  
H -0.28666 -0.17803 0.25617  
H -0.05044 -0.31537 0.17017  
H 0.10691 -0.37898 0.26623  
H 0.04050 0.04105 0.19946  
H 0.46646 0.04698 0.11243  
H 0.14959 0.32391 0.15459  
H 0.17736 0.13085 -0.02030  
H -0.04844 0.12708 0.04951  
H 0.01090 0.30479 -0.00839  
H 0.52492 0.32137 0.02359  
H 0.53692 0.42798 0.12574  
H 0.34070 0.48341 0.03907  
H -0.09637 0.24835 0.32698  
H 0.15681 0.23545 0.35359  
H 0.49241 0.60286 0.31850  
H 0.52129 0.427432 0.35327  
C -0.26795 -0.08557 0.42604  
C -0.07171 -0.14815 0.37142  
C 0.03744 -0.27256 0.23106  
C 0.23890 -0.16306 0.20624  
C 0.36544 0.11245 0.15802  
C 0.24790 0.26064 0.10674  
C 0.08588 0.20104 0.02677  
C 0.42504 0.38106 0.07195  
C 0.52931 0.17707 0.23810  
N -0.17306 0.02066 0.50213  
N -0.12741 -0.19101 0.28482

N 0.19345 -0.00255 0.18886  
O 0.12429 -0.16227 0.40878  
O 0.42986 -0.22898 0.20013  
O 0.73954 0.18500 0.22386  
O 0.44132 0.22228 0.31158  
O 0.52579 0.54099 0.37252  
O 0.01374 0.26060 0.37824

**Table 1.** The  $^{15}\text{N}$  Shift tensors for all benchmark compounds

| Structure                                      | Atom #                       | Exp.  | DFT-D2* | NMR refined |
|------------------------------------------------|------------------------------|-------|---------|-------------|
| Cimetidine<br>CIMETD03                         | 1                            | 248.2 | -29.7   | -15.8       |
|                                                |                              | 176.2 | 63.9    | 65.5        |
|                                                |                              | 86.5  | 166.1   | 155.9       |
|                                                | 3                            | 312.2 | -74.6   | -76.1       |
|                                                |                              | 252.9 | -14.3   | -13.3       |
|                                                |                              | 4.0   | 236.1   | 236.5       |
|                                                | 10                           | 160.2 | 74.0    | 76.9        |
|                                                |                              | 64.4  | 173.3   | 171.5       |
|                                                |                              | 64.4  | 179.8   | 177.6       |
|                                                | 12                           | 157.7 | 90.8    | 84.0        |
|                                                |                              | 58.3  | 190.4   | 184.1       |
|                                                |                              | 33.3  | 197.4   | 196.8       |
|                                                | 15                           | 129.3 | 108.6   | 109.9       |
|                                                |                              | 81.3  | 155.7   | 158.2       |
|                                                |                              | 46.0  | 192.6   | 191.3       |
|                                                | 17                           | 410.3 | -183.8  | -164.1      |
|                                                |                              | 315.1 | -82.8   | -82.3       |
| 32.9                                           |                              | 217.9 | 207.3   |             |
| Histidine HCl H <sub>2</sub> O<br>HISTCM01     | Nd1                          | 287.8 | -47.3   | -42.9       |
|                                                |                              | 217.5 | 15.8    | 20.1        |
|                                                |                              | 64.0  | 176.7   | 177.9       |
|                                                | Ne2                          | 276.6 | -39.4   | -34.4       |
|                                                |                              | 195.1 | 34.0    | 41.8        |
|                                                |                              | 57.8  | 184.9   | 186.2       |
|                                                | NH <sub>3</sub> <sup>+</sup> | 58.5  | 188.9   | 182.4       |
|                                                |                              | 45.3  | 198.9   | 194.3       |
|                                                |                              | 39.2  | 204.7   | 202.9       |
| Glycylglycine HCl H <sub>2</sub> O<br>GLCICH01 | NH <sub>3</sub> <sup>+</sup> | 43.8  | 202.9   | 201.0       |
|                                                |                              | 37.6  | 208.93  | 207.6       |
|                                                |                              | 28.8  | 213.7   | 212.6       |
|                                                | NH (amide)                   | 213.6 | 14.0    | 26.7        |
|                                                |                              | 66.0  | 173.1   | 175.7       |
| Thymine<br>THYMIN01                            | N1                           | 59.7  | 179.8   | 180.9       |
|                                                |                              | 211.4 | 15.3    | 24.1        |
|                                                |                              | 115.1 | 105.9   | 113.3       |
|                                                | N3                           | 55.6  | 189.1   | 181.6       |
|                                                |                              | 225.8 | -2.5    | 10.1        |
|                                                |                              | 146.9 | 85.1    | 83.6        |
| Acetaminophen<br>HXACAN26                      | N                            | 98.5  | 145.2   | 135.8       |
|                                                |                              | 240.5 | -31.6   | -12.1       |
|                                                |                              | 85.4  | 145.8   | 133.6       |
| Glycine (g-phase)<br>GLYCIN18                  | N                            | 85.3  | 162.6   | 149.4       |
|                                                |                              | 42.3  | 200.5   | 201.5       |
|                                                |                              | 34.3  | 210.8   | 209.3       |
|                                                |                              | 23.7  | 221.0   | 219.9       |

**Table 1.** The <sup>15</sup>N Shift tensors for all benchmark compounds (continued).

|               |            |     |       |       |
|---------------|------------|-----|-------|-------|
| AGG hydrate   | NH (amide) | 207 | 18.0  | 26.0  |
| CALEX20       |            | 59  | 177.9 | 178.9 |
|               |            | 48  | 189.5 | 188.8 |
| GGV dihydrate | NH (amide) | 218 | 10.5  | 16.0  |
| CUWRUH        |            | 63  | 167.9 | 168.0 |
|               |            | 53  | 185.0 | 181.9 |

**Table 2.** Data collection, refinement and other relevant crystallographic data for AGG.

|                                     | Over all | Inner Shell | Outer Shell |
|-------------------------------------|----------|-------------|-------------|
| Low resolution limit                | 4.90     | 4.90        | 0.61        |
| High resolution limit               | 0.58     | 1.83        | 0.58        |
| Rmerge                              | 0.116    | 0.066       | 0.112       |
| Rpim (all I+ & I-)                  | 0.063    | 0.041       | 0.103       |
| Total number of observations        | 5298     | 147         | 287         |
| Total number unique                 | 1815     | 61          | 171         |
| Mean(I)/sd(I)                       | 9.6      | 9.4         | 6.1         |
| Completeness                        | 66.2     | 66.5        | 44.1        |
| Multiplicity                        | 2.9      | 2.4         | 1.7         |
| <i>R</i> 1( <i>F</i> <sup>2</sup> ) | 0.0529   |             |             |



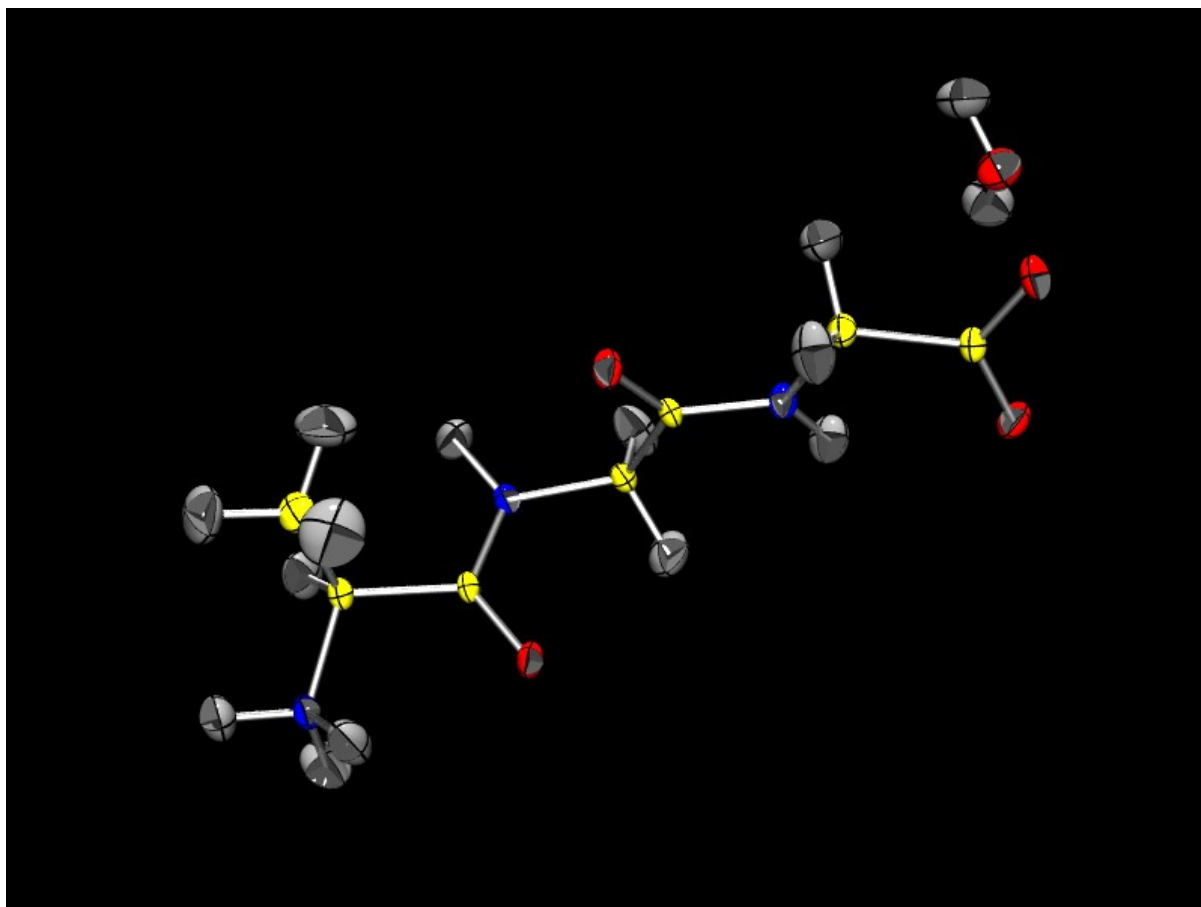

Figure 1. An ellipsoidal plot of the final structure of AGG obtained from the single crystal neutron analysis at 150 K (Ortep 3.2 for Windows (version 2.02)).
